# Supplementary material for: Nanodiamond/carbon nitride hybrid nanoarchitecture as an efficient metal-free catalyst for oxidant- and steam-free dehydrogenation
Source: Royal Society of Chemistry journal article supplement (doi:10.1039/c4ta02282c), 2014-01-01
Supplement: c4ta02282c1.pdf [file c4ta02282c1.pdf]

## Electronic Supplementary Information

### Nanodiamond/carbon nitride hybrid nanoarchitecture as an efficient metal-free catalyst for oxidant- and steam-free dehydrogenation†

Zhongkui Zhao,\* and Yitao Dai

State Key Laboratory of Fine Chemicals, Department of Catalysis Chemistry and Engineering, School of Chemical Engineering, Dalian University of Technology, Dalian 116024, China; E-mail: [zkzhao@dlut.edu.cn](mailto:zkzhao@dlut.edu.cn)

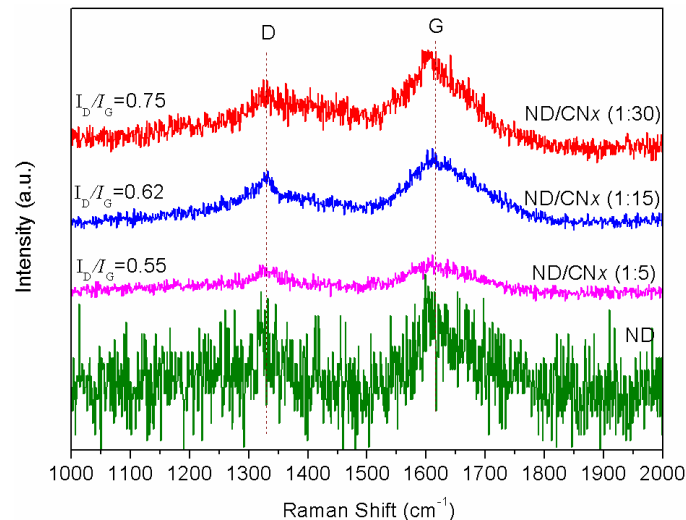

Fig. S1 Raman spectra of ND/CNx with diverse mass ratios of ND to melamine.

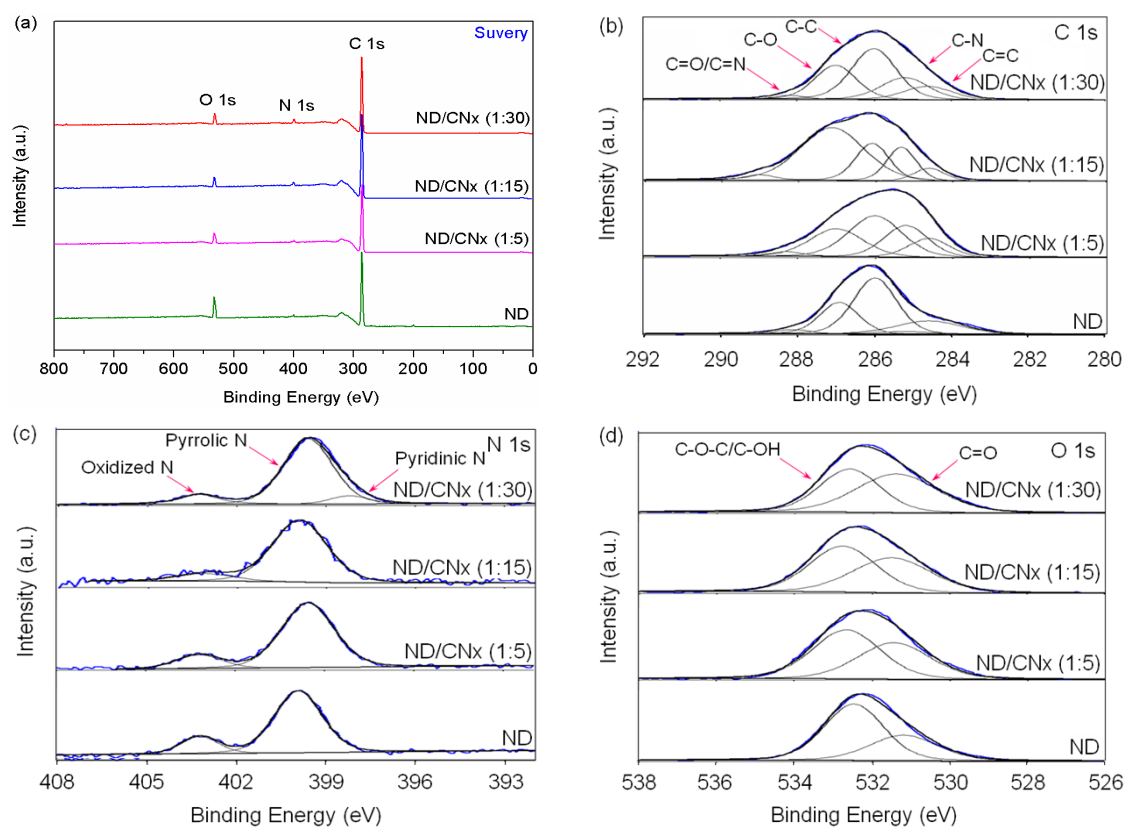

**Fig. S2** XPS spectra of ND/CNx nanostructures with diverse mass ratios of ND to melamines: (a) Survey spectra; (b) C 1s; (c) N 1s; (d) O 1s.

**Table S1.** Relative integrated intensity of the deconvoluted C 1s XPS spectra of ND/CNx with diverse pyrolysis temperatures, as well as the parent ND included for comparison.

| Sample                  | C=C<br>BE (eV)/Area <sup>a</sup> (%) | C-N<br>BE (eV)/Area <sup>a</sup> (%) | C-C<br>BE (eV)/Area <sup>a</sup> (%) | C-O<br>BE (eV)/Area <sup>a</sup> (%) | C=O/C=N<br>BE (eV)/Area <sup>a</sup> (%) |
|-------------------------|--------------------------------------|--------------------------------------|--------------------------------------|--------------------------------------|------------------------------------------|
| ND                      | 284.6/18.5                           | 285.2/4.1                            | 286.0/49.6                           | 287.0/25.0                           | 288.2/2.7                                |
| ND/CNx-650 <sup>b</sup> | 284.6/26.6                           | 285.2/2.0                            | 286.0/15.1                           | -/-                                  | 288.1/53.7                               |
| ND/CNx-700              | 284.6/15.4                           | 285.2/18.6                           | 286.0/40.9                           | 287.0/23.1                           | 288.3/1.9                                |
| ND/CNx-750              | 284.6/11.9                           | 285.2/19.3                           | 286.0/41.4                           | 287.0/25.5                           | 288.3/1.8                                |
| ND/CNx-800              | 284.6/12.6                           | 285.2/13.9                           | 286.0/42.0                           | 287.0/28.5                           | 288.3/3.0                                |

[a] Relative area percentage of various C species to the total C. [b] the peak appearing at 290 eV can be ascribed to absorbed CO<sub>2</sub> on the CNx layer (2.6% of percentage).

**Table S2.** Relative integrated intensity of the deconvoluted N 1s XPS spectra of ND/CNx with diverse pyrolysis temperatures, as well as the parent ND included for comparison.

| Sample                  | Nitrogen<br>atom percentage <sup>a</sup> (%) | Pyridinic N<br>BE (eV)/Area <sup>b</sup> (%)/<br>percentage <sup>c</sup> (%) | Pyrrolic N<br>BE (eV)/Area <sup>b</sup> (%)/<br>percentage <sup>c</sup> (%) | Graphitic N<br>BE (eV)/Area <sup>b</sup> (%)/<br>percentage <sup>c</sup> (%) | Oxidized N<br>BE (eV)/Area <sup>b</sup> (%)/<br>percentage <sup>c</sup> (%) |
|-------------------------|----------------------------------------------|------------------------------------------------------------------------------|-----------------------------------------------------------------------------|------------------------------------------------------------------------------|-----------------------------------------------------------------------------|
| ND                      | 1.5                                          | -/-                                                                          | 399.9/82.2/1.2                                                              | -/-                                                                          | 403.2/17.8/0.3                                                              |
| ND/CNx-650 <sup>b</sup> | 38.0                                         | 398.5/50.7/19.3                                                              | 399.6/46.8/17.8                                                             | -/-                                                                          | 403.4/2.5/0.9                                                               |
| ND/CNx-700              | 5.4                                          | 398.2/23.0/1.2                                                               | 399.6/74.1/4.0                                                              | -/-                                                                          | 403.2/2.9/0.2                                                               |
| ND/CNx-750              | 3.0                                          | 398.2/7.8/0.2                                                                | 399.6/81.4/2.4                                                              | -/-                                                                          | 403.3/10.8/0.3                                                              |
| ND/CNx-800              | 2.5                                          | -/-                                                                          | 399.6/85.2/2.1                                                              | -/-                                                                          | 403.1/14.8/0.4                                                              |

[a] Nitrogen atom percentage in the sample. [b] Relative area percentage of various N species to the total N atoms. [c] Surface percentage in the samples of various N species.

**Table S3.** Relative integrated intensity of the deconvoluted O 1s XPS spectra of ND/CNx with diverse pyrolysis temperatures, as well as the parent ND included for comparison.

| Sample     | Oxygen<br>atom percentage <sup>a</sup><br>(%) | C=O<br>BE (eV)/Area <sup>b</sup> (%) | C-O-C/C-OH<br>BE (eV)/Area <sup>b</sup> (%) | C=O<br>percentage <sup>c</sup><br>(%) | C-O-C/C-OH<br>percentage <sup>d</sup> (%) |
|------------|-----------------------------------------------|--------------------------------------|---------------------------------------------|---------------------------------------|-------------------------------------------|
| ND         | 9.4                                           | 531.2/33.2                           | 532.5/66.8                                  | 3.1                                   | 6.3                                       |
| ND/CNx-650 | 3.1                                           | 531.4/48.0                           | 532.6/52.0                                  | 1.5                                   | 1.6                                       |
| ND/CNx-700 | 3.9                                           | 531.4/53.8                           | 532.6/46.2                                  | 2.1                                   | 1.8                                       |
| ND/CNx-750 | 5.1                                           | 531.4/54.6                           | 532.6/45.4                                  | 2.7                                   | 2.3                                       |
| ND/CNx-800 | 3.4                                           | 531.4/60.7                           | 532.6/39.3                                  | 2.1                                   | 1.3                                       |

[a] Oxygen atom percentage in the sample. [b] Relative area percentage of various O species to the total O atoms. [c] Surface C=O percentage, calculated by total oxygen atom multiplies C=O relative area percentage to total O atoms. [d] Surface C-O-C/C-OH percentage, calculated by total oxygen atom multiplies C-O-C/C-OH relative area percentage to total O atoms.

**Table S4.** Relative integrated intensity of the deconvoluted C 1s XPS spectra of ND/CNx with diverse pyrolysis temperatures, as well as the parent ND included for comparison.

| Sample        | C=C<br>BE (eV)/Area <sup>a</sup> (%) | C-N<br>BE (eV)/Area <sup>a</sup> (%) | C-C<br>BE (eV)/Area <sup>a</sup> (%) | C-O<br>BE (eV)/Area <sup>a</sup> (%) | C=O/C=N<br>BE (eV)/Area <sup>a</sup> (%) |
|---------------|--------------------------------------|--------------------------------------|--------------------------------------|--------------------------------------|------------------------------------------|
| ND            | 284.6/18.5                           | 285.2/4.1                            | 286.0/49.6                           | 287.0/25.0                           | 288.2/2.7                                |
| ND/CNx (1:5)  | 284.6/12.9                           | 285.2/23.1                           | 286.0/36.2                           | 287.0/24.6                           | 288.3/3.3                                |
| ND/CNx (1:15) | 284.6/15.4                           | 285.3/18.6                           | 286.1/40.9                           | 287.1/23.1                           | 289.0/1.9                                |
| ND/CNx (1:30) | 284.6/11.9                           | 285.2/19.3                           | 286.0/41.4                           | 287.0/25.5                           | 288.3/1.8                                |

[a] Relative area percentage of various C species to the total C.

**Table S5.** Relative integrated intensity of the deconvoluted N 1s XPS spectra of ND/CNx with diverse pyrolysis temperatures, as well as the parent ND included for comparison.

| Sample        | Nitrogen<br>atom percentage <sup>a</sup> (%) | Pyridinic N<br>BE (eV)/Area <sup>b</sup> (%)/<br>percentage <sup>c</sup> (%) | Pyrrolic N<br>BE (eV)/Area <sup>b</sup> (%)/<br>percentage <sup>c</sup> (%) | Graphitic N<br>BE (eV)/Area <sup>b</sup> (%)/<br>percentage <sup>c</sup> (%) | Oxidized N<br>BE (eV)/Area <sup>b</sup> (%)/<br>percentage <sup>c</sup> (%) |
|---------------|----------------------------------------------|------------------------------------------------------------------------------|-----------------------------------------------------------------------------|------------------------------------------------------------------------------|-----------------------------------------------------------------------------|
| ND            | 1.5                                          | -/-/-                                                                        | 399.9/82.2/1.2                                                              | -/-/-                                                                        | 403.2/17.8/0.3                                                              |
| ND/CNx (1:5)  | 5.1                                          | -/-/-                                                                        | 399.6/84.7/4.3                                                              | -/-/-                                                                        | 403.2/15.3/0.9                                                              |
| ND/CNx (1:15) | 3.8                                          | -/-/-                                                                        | 399.9/88.6/3.4                                                              | -/-/-                                                                        | 403.1/11.4/0.4                                                              |
| ND/CNx (1:30) | 3.0                                          | 398.2/7.8/0.2                                                                | 399.6/81.4/2.4                                                              | -/-/-                                                                        | 403.3/10.8/0.3                                                              |

[a] Nitrogen atom percentage in the sample. [b] Relative area percentage of various N species to the total N atoms. [c] Surface percentage in the samples of various N species.

**Table S6.** Relative integrated intensity of the deconvoluted O 1s XPS spectra of ND/CNx with diverse pyrolysis temperatures, as well as the parent ND included for comparison.

| Sample        | Oxygen<br>atom percentage <sup>a</sup><br>(%) | C=O<br>BE (eV)/Area <sup>b</sup> (%) | C-O-C/C-OH<br>BE (eV)/Area <sup>b</sup> (%) | C=O<br>percentage <sup>c</sup><br>(%) | C-O-C/C-OH<br>percentage <sup>d</sup> (%) |
|---------------|-----------------------------------------------|--------------------------------------|---------------------------------------------|---------------------------------------|-------------------------------------------|
| ND            | 9.4                                           | 531.2/33.2                           | 532.5/66.8                                  | 3.1                                   | 6.3                                       |
| ND/CNx (1:5)  | 1.9                                           | 531.4/44.4                           | 532.7/55.6                                  | 0.8                                   | 1.1                                       |
| ND/CNx (1:15) | 2.4                                           | 531.5/47.2                           | 532.7/52.8                                  | 1.1                                   | 1.3                                       |
| ND/CNx (1:30) | 5.1                                           | 531.4/54.6                           | 532.6/45.4                                  | 2.7                                   | 2.3                                       |

[a] Oxygen atom percentage in the sample. [b] Relative area percentage of various O species to the total O atoms. [c] Surface C=O percentage, calculated by total oxygen atom multiplies C=O relative area percentage to total O atoms. [d] Surface C-O-C/C-OH percentage, calculated by total oxygen atom multiplies C-O-C/C-OH relative area percentage to total O atoms.
